# Supplementary material for: Limited Predictive or Prognostic Role of Tumor-Infiltrating Tissue-Resident Memory CD8 T Cells in Patients with Hepatocellular Carcinoma Receiving Immunotherapy
Source: MDPI journal article supplement (doi:10.3390/cancers13205142), 2021-10-14
Supplement: s1 [file s1]

# Limited predictive or prognostic role of tumor infiltrating tissue-resident memory CD8 T cells in patients with hepatocellular carcinoma receiving immunotherapy

Ying-Chun Shen, Ching-Ping Yeh, Yung-Ming Jeng, Chiun Hsu, Chih-Hung Hsu, Zhong-Zhe Lin, Yu-Yun Shao, Li-Chun Lu, Tsung-Hao Liu, Chien-Hung Chen and Ann-Lii Cheng

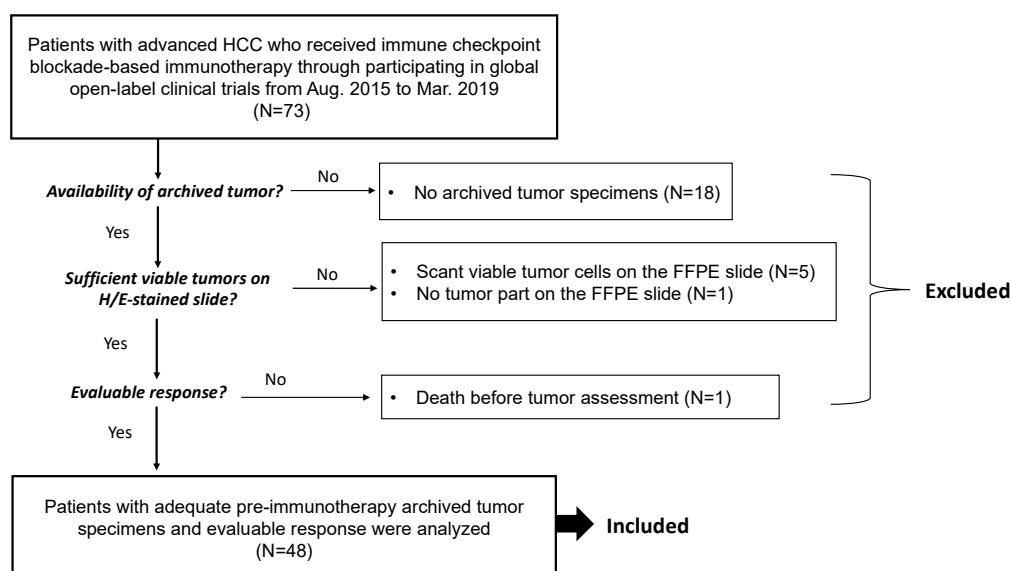

**Figure S1:** Patient selection flowchart.

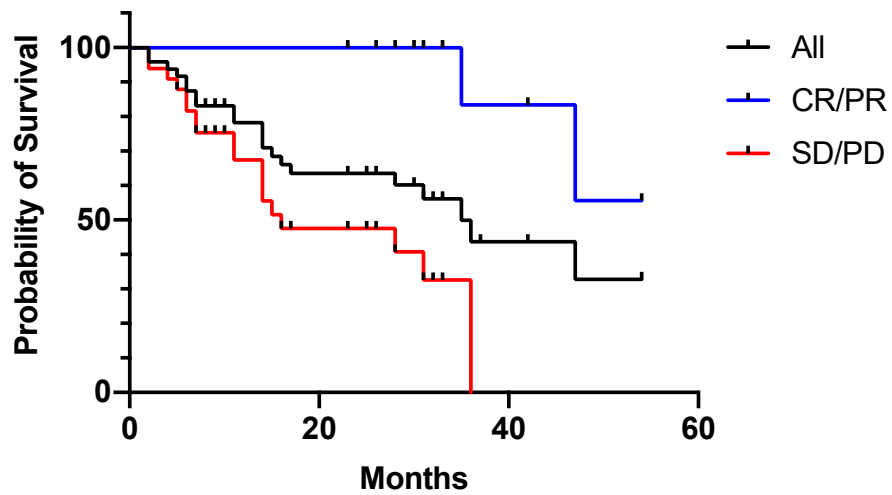

|       | Median OS (months) | HR (95% CI)        | P-value |
|-------|--------------------|--------------------|---------|
| CR/PR | undefined          | 0.1309             | 0.0003  |
| SD/PD | 16                 | (0.0543 to 0.3155) |         |

**Figure S2:** Overall survival of all patients, responders (CR/PR) and nonresponders (SD/PD). CR, complete response; PR, partial response; SD, stable disease; PD, progressive disease; HR, hazard ratio; *P*-value by Log-rank (Mantel-Cox) test.

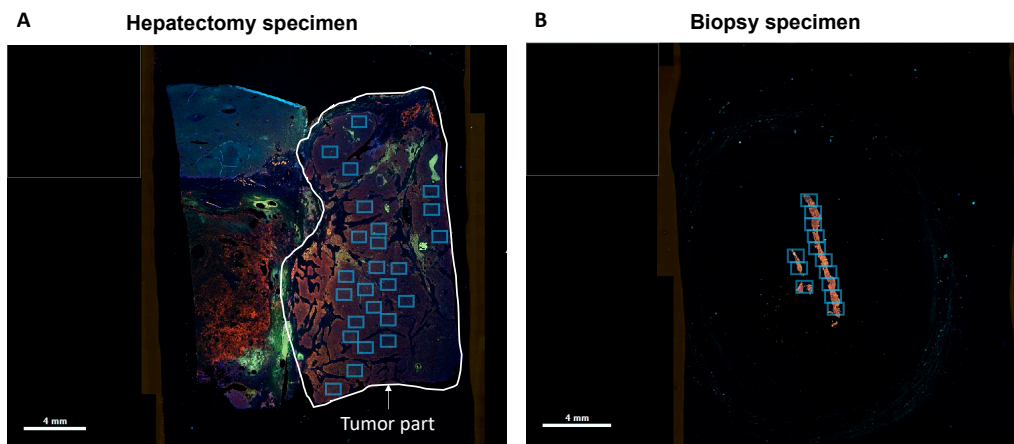

**Figure S3:** Selection of multispectral regions of interest. Each blue rectangle indicates a region of interest (200 $\times$  magnification field).

**Table S1:** Clinical trials of immune checkpoint blockade-based immunotherapy for advanced hepatocellular carcinoma during 2015-2019.

| Study name    | Phase | Treatment group                                                                                                    | Registration number |
|---------------|-------|--------------------------------------------------------------------------------------------------------------------|---------------------|
| CheckMate 040 | I/II  | -- Nivolumab<br>-- Ipilimumab<br>-- Nivolumab plus ipilimumab (3 arms)                                             | NCT01658878         |
| D4190C00022   | II    | -- Durvalumab<br>-- Tremelimumab<br>-- Durvalumab plus tremelimumab (2 regimens)<br>-- Durvalumab plus bevacizumab | NCT02519348         |
| GO30140       | Ib    | -- Atezolizumab<br>-- Atezolizumab plus bevacizumab                                                                | NCT02715531         |
| HIMALAYA      | III   | -- Durvalumab<br>-- Durvalumab plus tremelimumab (2 regimens)<br>-- Sorafenib                                      | NCT03298451         |
| BGB-A317-208  | II    | -- Tislelizumab                                                                                                    | NCT03419897         |
| MSD/GC207JG   | I     | -- Atezolizumab plus codrituzumab                                                                                  | JapicCTI-163325     |

**Table S2:** Characteristics of archived tumors and their multispectral imaging acquisition.

|              | All tumors<br>(N=48) | Surgical<br>specimens<br>(N=26) | Biopsy<br>specimens<br>(N=22) |
|--------------|----------------------|---------------------------------|-------------------------------|
| <b>Organ</b> |                      |                                 |                               |
| Liver        | 40                   | 21                              | 19                            |
| Lung         | 4                    | 2                               | 2                             |
| Lymph node   | 2                    | 1                               | 1                             |
| Bone         | 1                    | 1                               | 0                             |
| Chest wall   | 1                    | 1                               | 0                             |

|                                                    |           |         |          |
|----------------------------------------------------|-----------|---------|----------|
| <b>Sample age (month)</b>                          |           |         |          |
| Median                                             | 7.2       | 17.2    | 0.9      |
| Range                                              | 0.2-144.4 | 0.4-144 | 0.2-60.4 |
| <b>Number of multispectral regions of interest</b> |           |         |          |
| Average                                            | 18.7      | 28.4    | 7.3      |
| SD                                                 | 17.2      | 16.5    | 9.1      |

SD: standard deviation.
